# Supplementary material
Source: Royal Society of Chemistry journal article supplement (doi:10.1039/d6gc00841k)
Supplement: d6gc00841k1.pdf [file d6gc00841k1.pdf]

## Support Information

### Sustainable production of densified wood as advanced structural materials through oxygen delignification

Naycari Forfora<sup>1†</sup>, Xiaoxue Zhang<sup>2,3†</sup>, Carl J. Houtman<sup>2\*</sup>, Roland Gleisner<sup>2</sup>, Peter Kitin<sup>2</sup>, Sara J. Fishwild<sup>2</sup>, Marshall Begel<sup>2</sup>, Xuejun Pan<sup>3</sup>, Hoon Kim<sup>2</sup>, Ronalds Gonzales<sup>1\*</sup>, J.Y. Zhu<sup>2,3\*</sup>

<sup>1</sup> Dept. of Forest Biomaterials, North Carolina State University, NC 27606, USA

<sup>2</sup> USDA Forest Products Lab, Madison, WI 53726, USA

<sup>3</sup> Dept. of Biological Systems Eng., University of Wisconsin, Madison, WI 53705, USA

Tables S1- S11; Figs. S1-S3

† These two authors equally contributed to the work.

\* Corresponding author: [junyong.zhu@usda.gov](mailto:junyong.zhu@usda.gov)

**Table S1** Experimental conditions for basswood board alkaline soaking and oxygen delignification (O<sub>2</sub>-delig)

| Board labelling | Run abbreviation | NaOH soaking |        |      | Actual NaOH loading (g/kg) | O <sub>2</sub> -delig T (°C) | O <sub>2</sub> P (psi) | O <sub>2</sub> -delig time (h) |
|-----------------|------------------|--------------|--------|------|----------------------------|------------------------------|------------------------|--------------------------------|
|                 |                  | NaOH (g/L)   | T (°C) | time |                            |                              |                        |                                |
| A               | hA30T110O90      | 30           | 70     | 2 h  | 55.26                      | 110                          | 90                     | 1                              |
| B               | hA30T110O110     | 30           | 70     | 2 h  | 58.70                      | 110                          | 110                    | 1                              |
| C               | hA30T90O90       | 30           | 70     | 2 h  | 53.37                      | 90                           | 90                     | 1                              |
| D               | wA30T110O90      | 30           | 25     | 7 d  | 61.34                      | 110                          | 90                     | 1                              |
| E               | wA30T110O110     | 30           | 25     | 7 d  | 58.80                      | 110                          | 110                    | 1                              |
| F               | wA30T90O90       | 30           | 25     | 7 d  | 55.00                      | 90                           | 90                     | 1                              |
| G               | wA30T125O110-t05 | 30           | 25     | 7 d  | 52.96                      | 125                          | 110                    | 0.5                            |
| H               | wA30T125O110     | 30           | 25     | 7 d  | 58.49                      | 125                          | 110                    | 1                              |
| I               | wA50T110O110     | 50           | 25     | 7 d  | 98.48                      | 110                          | 110                    | 1                              |
| J               | wA15T110O110     | 15           | 25     | 7 d  | 27.99                      | 110                          | 110                    | 1                              |
| K               | Control          | N/A          | N/A    | N/A  | 55.26                      | N/A                          | N/A                    | N/A                            |

**Table S2** List of basswood board weight (g) before and after soaking, and after O<sub>2</sub>-delig

| Wood board | Initial weight | After NaOH soaking (g) | After O <sub>2</sub> -delig (g) | Post air-dry (g) | Post air-dry moisture (%) | O <sub>2</sub> -delig wood yield (%) | Length (cm) | Width (cm) | Thickness (cm) | samples cutout | Run abbreviation     |
|------------|----------------|------------------------|---------------------------------|------------------|---------------------------|--------------------------------------|-------------|------------|----------------|----------------|----------------------|
| A          | 726.0          | 2063.3                 | 1712.1                          | 660.7            | 8.38                      | 83.38                                | 45.4        | 17         | 2              | 18             | hA30T110O90          |
| B          | 695.2          | 2055.4                 | 1736.0                          | 628.1            | 8.47                      | 82.70                                | 45.4        | 16.7       | 2              | 18             | hA30sT110O11<br>0    |
| C          | 731.0          | 2031.5                 | 1877.0                          | 678.4            | 8.50                      | 84.92                                | 45.2        | 16.9       | 2              | 18             | hA30T90O90           |
| D          | 731.6          | 2227.4                 | 1984.0                          | 651.5            | 9.38                      | 80.70                                | 45.7        | 11.9       | 1.6            | 12             | wA30T110O90          |
| E          | 740.6          | 2192.1                 | 2004.0                          | 668.0            | 9.40                      | 81.72                                | 45.3        | 14         | 1.6            | 15             | wA30T110O110         |
| F          | 804.4          | 2279.1                 | 2115.9                          | 741.7            | 9.80                      | 83.17                                | 45.5        | 15.4       | 1.6            | 15             | wA30T90O90           |
| G          | 798.6          | 2208.4                 | 1892.4                          | 683.1            | 9.66                      | 77.28                                | 45.3        | 12.6       | 1.8            | 14             | wA30T125O110<br>-t05 |
| H          | 749.5          | 2210.9                 | 1955.0                          | 652.8            | 9.91                      | 78.47                                | 45.4        | 11         | 1.8            | 12             | wA30T125O110         |
| I          | 798.6          | 2371.5                 | 2186.0                          | 612.8            | 9.84                      | 69.18                                | 45.1        | 10.2       | 1.2            | 9              | wA50T110O110         |
| J          | 810.8          | 2324.0                 | 2035.2                          | 713.1            | 9.22                      | 79.84                                | 45.2        | 14         | 1.8            | 15             | wA15T110O110         |

## Mathematical wood mechanical strength enhancing factor (MEF) by densification

Assuming a wood board/panel has a rectangular cross-sectional area with width  $b$  and thickness  $t$ , then the tensile stress  $\sigma$ , bending modulus of rupture (MOR), and bending modulus of elasticity (MOE) can be expressed as below

$$\sigma = \frac{F'_{max}}{t \cdot b} \quad (S1)$$

$$MOR = \frac{3 \times F_{max} \times l}{2 \times b \times t^2} \quad (S2)$$

$$MOE = \frac{l^3}{4 \times b \times t^3} K \quad (S3)$$

When the wood cross-sectional area thickness is decreased by  $\Delta t$  by densification, the tensile stress, MOR, and MOE can be recalculated below

$$\sigma_{\Delta t} = \frac{F'_{max}}{(t - \Delta t) \cdot b} \quad (S4)$$

$$MOR_{\Delta t} = \frac{3 \times F_{max} \times l}{2 \times b \times (t - \Delta t)^2} \quad (S5)$$

$$MOE_{\Delta t} = \frac{l^3}{4 \times b \times (t - \Delta t)^3} K \quad (S6)$$

The ‘‘Mathematical enhancing factor’’ (MEF) for each of these strength measures can be expressed as below, with  $\delta_t = \frac{\Delta t}{t}$  as relative thickness reduction.

$$MEF_{\sigma} = \frac{\sigma_{\Delta t}}{\sigma} = \frac{t}{t - \Delta t} = \frac{1}{1 - \delta_t} \quad (S7)$$

$$MEF_{MOR} = \frac{MOR_{\Delta t}}{MOR} = \frac{t^2}{t^2 - 2t\Delta t + (\Delta t)^2} = \frac{1}{1 - 2\delta_t + \delta_t^2} \quad (S8)$$

$$MEF_{MOE} = \frac{MOE_{\Delta t}}{MOE} = \frac{t^3}{t^3 - 3t\Delta t(t - \Delta t) - (\Delta t)^3} = \frac{1}{1 - 3\delta_t(1 - \delta_t) - \delta_t^3}$$

(S9)

**Table S3** Assumptions common to all treatments

| <b>Assumptions</b>      | <b>Value</b> | <b>Unit</b>       |
|-------------------------|--------------|-------------------|
| Basis (wood input dry)  | 1500         | kg/day            |
| Wood moisture           | 12%          |                   |
| Wood density (dry)      | 500          | kg/m <sup>3</sup> |
| Wood density (max)      | 1500         | kg/m <sup>3</sup> |
| Wood heat capacity      | 1.3          | kJ/kg             |
| Impregnation time       | 1            | hr                |
| Chemical temperature    | 55           | °C                |
| Liquid to wood          | 3            | kg liq/kg wood    |
| Liquid adsorbed         | 2            | kg liq/kg wood    |
| Wash water              | 1            | kg liq/kg wood    |
| Steam pressure          | 120          | psig              |
| Volumetric change press | 65%          |                   |

**Table S4** Results of the mass balance calculations

|                   | Oxygen | Unit           |
|-------------------|--------|----------------|
| Yield             | 82%    |                |
| Cook Temperature  | 110    | °C             |
| Cook Time         | 1      | hr             |
| Chemical Loading  | 1%     |                |
| Batches/day       | 8      |                |
| Vessel volume     | 4.7    | m <sup>3</sup> |
| Production        | 9840   | kg/day         |
| Make up water     | 1187   | kg/day         |
| Make up Chemicals | 38     | kg/day         |
| Steam             | 3047   | kg/day         |
| Oxygen            | 750    | kg/day         |

**Table S5** Life cycle inventory to produce advanced wood materials.

|                             | Unit/kg bleached wood | Densified wood –<br>O <sub>2</sub> -delig |
|-----------------------------|-----------------------|-------------------------------------------|
| Water                       | kg                    | 0.12                                      |
| NaOH                        | kg                    | 0.00389                                   |
| Oxygen                      | kg                    | 0.0762                                    |
| Steam                       | kg                    | 0.31                                      |
| Wood                        | kg                    | 1.22                                      |
| Transportation of chemicals | kg.km                 | 8.01                                      |
| Organics                    | kg                    | 0.22                                      |
| Inorganics                  | g                     | 3.86                                      |

**Table S6** End-of-life factors for wood and metal-based building materials using WARM (EPA, 2023).

| <b>Product</b>                         | End-of-life factor<br>(kgCO <sub>2</sub> /kg),<br>combustion | End-of-life factor<br>(kgCO <sub>2</sub> /kg), landfilling<br>(landfills without LFG<br>recovery) | End-of-life<br>factor<br>(kgCO <sub>2</sub> /kg),<br>recycling |
|----------------------------------------|--------------------------------------------------------------|---------------------------------------------------------------------------------------------------|----------------------------------------------------------------|
| Densified wood – O <sub>2</sub> -delig | -0.58                                                        | -0.92                                                                                             | -                                                              |
| Steel – HRC                            | -                                                            | -                                                                                                 | -1.83                                                          |
| Steel – LRC                            | -                                                            | -                                                                                                 | -1.83                                                          |
| Al-alloy – HRC                         | -                                                            | -                                                                                                 | -7.2                                                           |
| Al-alloy – LRC                         | -                                                            | -                                                                                                 | -7.2                                                           |

**Table S7** ANOVA of wood density and mechanical properties among undensified, densified but differently delignified wood groups

| Board labelling                                                                | Group label | Density (g/cm <sup>3</sup> ) | Hardness (MPa) | MOR (MPa)      | MOE (GPa) (Short span) |
|--------------------------------------------------------------------------------|-------------|------------------------------|----------------|----------------|------------------------|
| Undensified: pristine wood                                                     | <i>X1</i>   | 0.446±0.039                  | 13.2±1.1       | 59.5±7.8       | 1.74                   |
| Densified:<br>pristine wood (K) +<br>delignified wood (short impregnation A-C) | <i>X2</i>   | 0.779±0.014                  | 24.6±1.8       | 114.5±9.1      | 8.6±1.3                |
| Densified:<br>delignified wood (long impregnation D-J)                         | <i>X3</i>   | 0.996±0.071                  | 67.8±15.8      | 108.1±4.5      | 14.4±2.8               |
| <i>p value: X1-X2</i>                                                          |             | <i>0.00007</i>               | <i>0.00129</i> | <i>0.00196</i> |                        |
| <i>p value: X1-X3</i>                                                          |             | <i>0.00002</i>               | <i>0.00238</i> | <i>0.00012</i> |                        |
| <i>p value: X2-X3</i>                                                          |             | <i>0.00022</i>               | <i>0.00049</i> | <i>0.00014</i> | <i>0.00369</i>         |

**Table S8** ANOVA of densified wood MOR and hardness between O<sub>2</sub>-delig paired runs I, J, and D

| <i>p values for paired runs</i> | I - J         | I - D         | J - D         |
|---------------------------------|---------------|---------------|---------------|
| MOR                             | <i>0.0126</i> | <i>0.0130</i> | <i>0.9999</i> |
| Hardness                        | <i>0.6753</i> | <i>0.5063</i> | <i>0.9089</i> |

**Table S9a** Environmental impact categories to produce building materials based on 1 kg of material.

| <b>Indicator</b>      | Densified wood<br>– O <sub>2</sub> -delig | Al-alloy – LRC | Al-alloy – HRC | Steel – LRC | Steel – HRC | Unit per<br>cm <sup>3</sup> /MPa |
|-----------------------|-------------------------------------------|----------------|----------------|-------------|-------------|----------------------------------|
| Acidification         | 1.44E-03                                  | 9.94E-02       | 4.66E-02       | 7.88E-03    | 3.91E-03    | kg SO <sub>2</sub> eq            |
| Carcinogenics         | 7.94E-08                                  | 1.44E-05       | 5.38E-06       | 9.09E-06    | 8.97E-06    | CTUh                             |
| Ecotoxicity           | 6.19E+00                                  | 4.45E+02       | 2.37E+02       | 2.06E+02    | 1.79E+02    | CTUe                             |
| Eutrophication        | 1.17E-02                                  | 7.36E-02       | 3.77E-02       | 8.48E-03    | 4.96E-03    | kg N eq                          |
| Fossil fuel depletion | 1.15E+00                                  | 1.23E+01       | 7.44E+00       | 1.11E+00    | 6.79E-01    | MJ surplus                       |
| Global warming        | 6.09E-01                                  | 1.89E+01       | 9.40E+00       | 2.31E+00    | 9.12E-01    | kg CO <sub>2</sub> eq            |
| Non carcinogenics     | 8.75E-08                                  | 6.40E-06       | 3.30E-06       | 7.93E-07    | 6.47E-07    | CTUh                             |
| Ozone depletion       | 1.22E-08                                  | 2.08E-07       | 1.12E-07       | 1.23E-08    | 7.67E-09    | kg CFC <sup>-11</sup> eq         |
| Respiratory effects   | 2.93E-04                                  | 2.06E-02       | 1.11E-02       | 2.93E-03    | 1.30E-03    | kg PM2.5 eq                      |
| Smog                  | 3.07E-02                                  | 1.14E+00       | 5.37E-01       | 1.16E-01    | 5.65E-02    | kg O <sub>3</sub> eq             |

**Table S9b** Environmental impact categories to produce building materials based on specific strength. The comparison of specific strength was based on modulus of rupture (MOR) for densified-wood and ultimate tensile strength (UTS) for the metal alloys. Specific strengths: Advanced-wood, MOR: 221 MPa cm<sup>3</sup>/g; Al-alloy, UTS: 168 MPa cm<sup>3</sup>/g; HSSS (specific strength steel), UTS: 168 MPa cm<sup>3</sup>/g

(<https://asm.matweb.com/search/SpecificMaterial.asp?bassnum=MA2024T4>,

[https://static.markforged.com/downloads/markforged\\_datasheet\\_17-4\\_ph\\_stainless\\_steel.pdf](https://static.markforged.com/downloads/markforged_datasheet_17-4_ph_stainless_steel.pdf)

<https://specialtysteelsupply.com/wp-content/docs/17-4ph.pdf>)

| <b>Indicator</b>      | Densified wood<br>– O <sub>2</sub> -delig | Al-alloy – LRC | Al-alloy – HRC | Steel – LRC | Steel – HRC | Unit per<br>cm <sup>3</sup> /MPa |
|-----------------------|-------------------------------------------|----------------|----------------|-------------|-------------|----------------------------------|
| Acidification         | 6.48E-09                                  | 5.89E-07       | 2.76E-07       | 4.69E-08    | 2.33E-08    | kg SO <sub>2</sub> eq            |
| Carcinogenics         | 3.58E-13                                  | 8.51E-11       | 3.19E-11       | 5.41E-11    | 5.34E-11    | CTUh                             |
| Ecotoxicity           | 2.79E-05                                  | 2.64E-03       | 1.41E-03       | 1.23E-03    | 1.06E-03    | CTUe                             |
| Eutrophication        | 5.28E-08                                  | 4.36E-07       | 2.24E-07       | 5.05E-08    | 2.95E-08    | kg N eq                          |
| Fossil fuel depletion | 5.17E-06                                  | 7.30E-05       | 4.41E-05       | 6.63E-06    | 4.04E-06    | MJ surplus                       |
| Global warming        | 2.75E-06                                  | 1.12E-04       | 5.57E-05       | 1.37E-05    | 5.43E-06    | kg CO <sub>2</sub> eq            |
| Non carcinogenics     | 3.95E-13                                  | 3.79E-11       | 1.96E-11       | 4.72E-12    | 3.85E-12    | CTUh                             |
| Ozone depletion       | 5.48E-14                                  | 1.23E-12       | 6.66E-13       | 7.31E-14    | 4.57E-14    | kg CFC <sup>-11</sup> eq         |
| Respiratory effects   | 1.32E-09                                  | 1.22E-07       | 6.58E-08       | 1.75E-08    | 7.74E-09    | kg PM <sub>2.5</sub> eq          |
| Smog                  | 1.38E-07                                  | 6.77E-06       | 3.19E-06       | 6.93E-07    | 3.36E-07    | kg O <sub>3</sub> eq             |

**Table S10:** Comparison table for densified wood production.

| <b>Parameter</b>                                  | <b>O<sub>2</sub>-Delignification (This Work)</b>                  | <b>Peroxide-Based Delignification</b>                           | <b>Sulfite-Based Delignification</b>                          | <b>Alkaline Delignification (NaOH / Carbonate / AQ)</b>                                                |
|---------------------------------------------------|-------------------------------------------------------------------|-----------------------------------------------------------------|---------------------------------------------------------------|--------------------------------------------------------------------------------------------------------|
| <b>Typical chemical charge</b>                    | 28–56 g/kg NaOH                                                   | 5–30 wt% H <sub>2</sub> O <sub>2</sub> (often with acetic acid) | 10–20 wt% Na <sub>2</sub> SO <sub>3</sub>                     | High alkaline loadings (typically several wt% NaOH solutions, often at elevated liquor-to-wood ratios) |
| <b>Temperature</b>                                | 90–110 °C                                                         | 120–150 °C                                                      | 100–140 °C                                                    | 150–170 °C                                                                                             |
| <b>Pressure</b>                                   | 0.6–0.8 MPa O <sub>2</sub>                                        | Atmospheric or autoclave                                        | Atmospheric or mild pressure                                  | Atmospheric or mild pressure                                                                           |
| <b>Reaction time</b>                              | 1 h                                                               | 2–12 h                                                          | 6–12 h                                                        | 1–3 h                                                                                                  |
| <b>Lignin removal</b>                             | 10–30%                                                            | 40–80%                                                          | 40–70%                                                        | 60–90%                                                                                                 |
| <b>Environmental issues</b>                       | No sulfur; low chemical load; no chemical recovery needed         | High oxidant cost; safety concerns; wastewater treatment        | SO <sub>2</sub> emissions; sulfite recovery required          | High-energy chemical recovery (lime kiln, evaporation)                                                 |
| <b>Mechanical performance after densification</b> | MOR > 220 MPa; Brinell > 80 MPa                                   | MOR 200–250 MPa                                                 | MOR 200–250 MPa                                               | MOR 200–300 MPa [3,4]                                                                                  |
| <b>Scalability</b>                                | High (low-temperature, low-chemical, no recovery system required) | Moderate (chemical cost & safety)                               | Low (sulfur handling & recovery)                              | Low–moderate (requires capital intensive kraft-like recovery system)                                   |
| <b>Key advantages</b>                             | Low cost, low temperature, scalable, minimal carbohydrate loss    | High delignification; good transparency & moldability           | Good delignification                                          | Strong densification; well-studied chemistry                                                           |
| <b>Key drawbacks</b>                              | Partial delignification only                                      | Expensive chemicals; safety                                     | Sulfur emissions; recovery                                    | High capital cost; high energy                                                                         |
| <b>References</b>                                 |                                                                   | <a href="https://www.nature.com/">https://www.nature.com/</a>   | <a href="https://www.nature.com/">https://www.nature.com/</a> | <a href="https://www.research-">https://www.research-</a>                                              |

|  |  |                                                                                                                                                                                                                                                                                                                                                                                                                                                                                                                 |                                                                                                                                                                                                                                                                                                                                                                                                                                                                                                                                                                                                               |                                                                                                                                                                                                                                                                                                                                                                                                                                                                     |
|--|--|-----------------------------------------------------------------------------------------------------------------------------------------------------------------------------------------------------------------------------------------------------------------------------------------------------------------------------------------------------------------------------------------------------------------------------------------------------------------------------------------------------------------|---------------------------------------------------------------------------------------------------------------------------------------------------------------------------------------------------------------------------------------------------------------------------------------------------------------------------------------------------------------------------------------------------------------------------------------------------------------------------------------------------------------------------------------------------------------------------------------------------------------|---------------------------------------------------------------------------------------------------------------------------------------------------------------------------------------------------------------------------------------------------------------------------------------------------------------------------------------------------------------------------------------------------------------------------------------------------------------------|
|  |  | <a href="https://www.semanticscholar.org/paper/Integration-of-peroxide-delignification-and-acid-Kuznetsov-Levdansky/b57957848c4edb5b398a2d389cf6e2ec2b8d4592">articles/nature25476</a><br><a href="https://www.semanticscholar.org/paper/Integration-of-peroxide-delignification-and-acid-Kuznetsov-Levdansky/b57957848c4edb5b398a2d389cf6e2ec2b8d4592">https://www.semanticscholar.org/paper/Integration-of-peroxide-delignification-and-acid-Kuznetsov-Levdansky/b57957848c4edb5b398a2d389cf6e2ec2b8d4592</a> | <a href="https://www.semanticscholar.org/paper/MECHANICAL-PROPERTIES-TESTS-OF-DELIGNIFIED-AND-WOOD-Wehsener-Bremer/4721ee2510c3f8ad4c87438daa9c7b5338e7c368">articles/nature25476</a><br><a href="https://www.semanticscholar.org/paper/MECHANICAL-PROPERTIES-TESTS-OF-DELIGNIFIED-AND-WOOD-Wehsener-Bremer/4721ee2510c3f8ad4c87438daa9c7b5338e7c368">https://www.semanticscholar.org/paper/MECHANICAL-PROPERTIES-TESTS-OF-DELIGNIFIED-AND-WOOD-Wehsener-Bremer/4721ee2510c3f8ad4c87438daa9c7b5338e7c368</a><br><a href="https://www.mdpi.com/1999-4907/15/6/892">https://www.mdpi.com/1999-4907/15/6/892</a> | <a href="https://collection.ethz.ch/entities/publication/e922a964-6aa8-47b6-b356-5dc1a28bacc9">collection.ethz.ch/entities/publication/e922a964-6aa8-47b6-b356-5dc1a28bacc9</a><br><a href="https://cerne.ufla.br/site/index.php/CERNE/article/view/3521">https://cerne.ufla.br/site/index.php/CERNE/article/view/3521</a><br><a href="https://link.springer.com/article/10.1186/s10086-020-1853-x">https://link.springer.com/article/10.1186/s10086-020-1853-x</a> |
|--|--|-----------------------------------------------------------------------------------------------------------------------------------------------------------------------------------------------------------------------------------------------------------------------------------------------------------------------------------------------------------------------------------------------------------------------------------------------------------------------------------------------------------------|---------------------------------------------------------------------------------------------------------------------------------------------------------------------------------------------------------------------------------------------------------------------------------------------------------------------------------------------------------------------------------------------------------------------------------------------------------------------------------------------------------------------------------------------------------------------------------------------------------------|---------------------------------------------------------------------------------------------------------------------------------------------------------------------------------------------------------------------------------------------------------------------------------------------------------------------------------------------------------------------------------------------------------------------------------------------------------------------|

## Rough estimate of chemical and energy input costs for wood delignification

Because delignification represents one of the major cost drivers in densified wood production, it is useful to compare the chemical intensity of the present O<sub>2</sub>-delig process with conventional alkaline delignification using NaOH reported in the densified wood literature. For example, our earlier study produced densified poplar wood using 2 – 6 wt. % NaOH with a liquor-to-wood ratio of approximately 3 achieved effective delignification (Wang et al, J Mat Sci., 55:14664, 2020). These conditions correspond to gross alkali charges of approximately 0.06–0.18 kg NaOH per kg dry wood prior to densification. After accounting for the reported solids yields of 74–90%, the effective NaOH consumption corresponds to approximately 0.066–0.242 kg NaOH per kg densified wood product. In contrast, the O<sub>2</sub>-delig process developed in this study requires approximately 0.0039 kg NaOH and 0.076 kg O<sub>2</sub>/kg densified wood according to the life-cycle inventory used for the LCA analysis (Table S5).

A simple screening-level comparison of variable chemical cost can therefore be performed using representative bulk chemical prices (NaOH ≈ \$0.38/kg and industrial oxygen ≈ \$0.25/kg densified wood) (<https://www.chemanalyst.com/Pricing-data/caustic-soda-3>, <https://www.imarcgroup.com/bulk-oxygen-pricing-report>). Under these assumptions, the chemical cost associated with the O<sub>2</sub>-delig is approximately \$0.020/kg densified wood (NaOH + O<sub>2</sub>). By comparison, the NaOH delignification (Wang et al., J Mat Sci., 55:14664, 2020) ranges from \$0.026-0.092/kg densified wood from NaOH consumption alone.

A simple sensible-heat estimate using the same liquor-to-wood ratio of 3:1 for both delignification processes indicates that heating from 55 °C to the reaction temperature requires approximately 0.59–0.93 MJ/kg densified wood for O<sub>2</sub>-delig (90–110 °C), compared with 1.46–2.14 MJ/kg densified wood for a representative NaOH delignification operated at 150–170 °C. Considering natural gas prices (\$0.22/m<sup>3</sup>) (<https://www.eia.gov/dnav/ng/hist/n3035us3m.htm>), costs associated with sensible heat ranges from \$0.0044-0.0069/kg densified wood for the O<sub>2</sub>-delig and \$0.011-0.016/kg densified wood for the NaOH process (<https://link.springer.com/article/10.1007/s10853-020-05034-2>). This corresponds to roughly a 2.1–2.7-fold reduction in thermal energy costs, and a up to a total 4.4-fold time cost reduction (chemical + heat), highlighting the potential economic benefit for O<sub>2</sub>-delig. Although this simplified comparison does not include capital investment, heat losses, chemical recovery, or labor

costs, it illustrates that the substantially lower alkali consumption and lower thermal demand of the O<sub>2</sub>-delig process can offset the additional oxygen input. A rigorous techno-economic analysis is beyond the scope of this work; however, this preliminary comparison indicates that the O<sub>2</sub>-delig can be competitive with conventional alkaline delignification in terms of variable operating cost.

**Table S11** Cradle-to-grave carbon footprint results for building materials based on specific strength. The comparison of specific strength was based on modulus of rupture (MOR) for densified-wood and ultimate tensile strength (UTS) for the metal alloys. Specific strengths: Advanced-wood, MOR: 221 MPa cm<sup>3</sup>/g; Al-alloy, UTS: 168 MPa cm<sup>3</sup>/g; HSSS (specific strength steel), UTS: 168 MPa cm<sup>3</sup>/g

(<https://asm.matweb.com/search/SpecificMaterial.asp?bassnum=MA2024T4>,  
[https://static.markforged.com/downloads/markforged\\_datasheet\\_17-4\\_ph\\_stainless\\_steel.pdf](https://static.markforged.com/downloads/markforged_datasheet_17-4_ph_stainless_steel.pdf)  
<https://specialtysteelsupply.com/wp-content/docs/17-4ph.pdf>)

| Product                                   | End-of-life factor<br>(kgCO <sub>2</sub> eq/cm <sup>3</sup> /MPa),<br>combustion | End-of-life factor<br>(kgCO <sub>2</sub> eq/cm <sup>3</sup> /MPa),<br>landfilling (landfills<br>without LFG recovery) | End-of-life factor<br>(kgCO <sub>2</sub> eq/cm <sup>3</sup> /MPa),<br>recycling |
|-------------------------------------------|----------------------------------------------------------------------------------|-----------------------------------------------------------------------------------------------------------------------|---------------------------------------------------------------------------------|
| Densified wood -<br>O <sub>2</sub> -delig | 8.76E-07                                                                         | -2.20E-07                                                                                                             | -                                                                               |
| Steel – HRC                               | -                                                                                | -                                                                                                                     | -2.89E-06                                                                       |
| Steel – LRC                               | -                                                                                | -                                                                                                                     | 5.43E-06                                                                        |
| Al-alloy – HRC                            | -                                                                                | -                                                                                                                     | 1.78E-05                                                                        |
| Al-alloy – LRC                            | -                                                                                | -                                                                                                                     | 7.40E-05                                                                        |

| <b>Physical Properties</b>                                                                                                                                                                                                                                                                                                                                                                                                                                                                                                                                                                                                                                                                                                                                                                                                                                                                                                                                                                                                                                                                                                                            |                                                                                    |                        |                           |                        |     |      |     |     |     |     |     |     |     |     |     |     |     |     |     |     |     |     |     |     |      |
|-------------------------------------------------------------------------------------------------------------------------------------------------------------------------------------------------------------------------------------------------------------------------------------------------------------------------------------------------------------------------------------------------------------------------------------------------------------------------------------------------------------------------------------------------------------------------------------------------------------------------------------------------------------------------------------------------------------------------------------------------------------------------------------------------------------------------------------------------------------------------------------------------------------------------------------------------------------------------------------------------------------------------------------------------------------------------------------------------------------------------------------------------------|------------------------------------------------------------------------------------|------------------------|---------------------------|------------------------|-----|------|-----|-----|-----|-----|-----|-----|-----|-----|-----|-----|-----|-----|-----|-----|-----|-----|-----|-----|------|
| <b>Organic Solvent Dissolution Efficiency (%)</b>                                                                                                                                                                                                                                                                                                                                                                                                                                                                                                                                                                                                                                                                                                                                                                                                                                                                                                                                                                                                                                                                                                     |                                                                                    |                        |                           |                        |     |      |     |     |     |     |     |     |     |     |     |     |     |     |     |     |     |     |     |     |      |
| Hexane                                                                                                                                                                                                                                                                                                                                                                                                                                                                                                                                                                                                                                                                                                                                                                                                                                                                                                                                                                                                                                                                                                                                                | 3                                                                                  |                        |                           |                        |     |      |     |     |     |     |     |     |     |     |     |     |     |     |     |     |     |     |     |     |      |
| Ethanol                                                                                                                                                                                                                                                                                                                                                                                                                                                                                                                                                                                                                                                                                                                                                                                                                                                                                                                                                                                                                                                                                                                                               | 8                                                                                  |                        |                           |                        |     |      |     |     |     |     |     |     |     |     |     |     |     |     |     |     |     |     |     |     |      |
| Dioxane                                                                                                                                                                                                                                                                                                                                                                                                                                                                                                                                                                                                                                                                                                                                                                                                                                                                                                                                                                                                                                                                                                                                               | 12                                                                                 |                        |                           |                        |     |      |     |     |     |     |     |     |     |     |     |     |     |     |     |     |     |     |     |     |      |
| Aceton                                                                                                                                                                                                                                                                                                                                                                                                                                                                                                                                                                                                                                                                                                                                                                                                                                                                                                                                                                                                                                                                                                                                                | 13                                                                                 |                        |                           |                        |     |      |     |     |     |     |     |     |     |     |     |     |     |     |     |     |     |     |     |     |      |
| Acetic acid                                                                                                                                                                                                                                                                                                                                                                                                                                                                                                                                                                                                                                                                                                                                                                                                                                                                                                                                                                                                                                                                                                                                           | 26                                                                                 |                        |                           |                        |     |      |     |     |     |     |     |     |     |     |     |     |     |     |     |     |     |     |     |     |      |
| <b>Molecular Weight</b>                                                                                                                                                                                                                                                                                                                                                                                                                                                                                                                                                                                                                                                                                                                                                                                                                                                                                                                                                                                                                                                                                                                               |                                                                                    |                        |                           |                        |     |      |     |     |     |     |     |     |     |     |     |     |     |     |     |     |     |     |     |     |      |
| Mn                                                                                                                                                                                                                                                                                                                                                                                                                                                                                                                                                                                                                                                                                                                                                                                                                                                                                                                                                                                                                                                                                                                                                    | 1956                                                                               |                        |                           |                        |     |      |     |     |     |     |     |     |     |     |     |     |     |     |     |     |     |     |     |     |      |
| Mw                                                                                                                                                                                                                                                                                                                                                                                                                                                                                                                                                                                                                                                                                                                                                                                                                                                                                                                                                                                                                                                                                                                                                    | 3215                                                                               |                        |                           |                        |     |      |     |     |     |     |     |     |     |     |     |     |     |     |     |     |     |     |     |     |      |
| PDI                                                                                                                                                                                                                                                                                                                                                                                                                                                                                                                                                                                                                                                                                                                                                                                                                                                                                                                                                                                                                                                                                                                                                   | 1.64                                                                               |                        |                           |                        |     |      |     |     |     |     |     |     |     |     |     |     |     |     |     |     |     |     |     |     |      |
| <b>CIE Measure L*a*b* and Color</b>                                                                                                                                                                                                                                                                                                                                                                                                                                                                                                                                                                                                                                                                                                                                                                                                                                                                                                                                                                                                                                                                                                                   |                                                                                    |                        |                           |                        |     |      |     |     |     |     |     |     |     |     |     |     |     |     |     |     |     |     |     |     |      |
| L                                                                                                                                                                                                                                                                                                                                                                                                                                                                                                                                                                                                                                                                                                                                                                                                                                                                                                                                                                                                                                                                                                                                                     | 59.4                                                                               |                        |                           |                        |     |      |     |     |     |     |     |     |     |     |     |     |     |     |     |     |     |     |     |     |      |
| a                                                                                                                                                                                                                                                                                                                                                                                                                                                                                                                                                                                                                                                                                                                                                                                                                                                                                                                                                                                                                                                                                                                                                     | 6.4                                                                                |                        |                           |                        |     |      |     |     |     |     |     |     |     |     |     |     |     |     |     |     |     |     |     |     |      |
| b                                                                                                                                                                                                                                                                                                                                                                                                                                                                                                                                                                                                                                                                                                                                                                                                                                                                                                                                                                                                                                                                                                                                                     | 13.3                                                                               |                        |                           |                        |     |      |     |     |     |     |     |     |     |     |     |     |     |     |     |     |     |     |     |     |      |
| Calculated Color patch                                                                                                                                                                                                                                                                                                                                                                                                                                                                                                                                                                                                                                                                                                                                                                                                                                                                                                                                                                                                                                                                                                                                |   |                        |                           |                        |     |      |     |     |     |     |     |     |     |     |     |     |     |     |     |     |     |     |     |     |      |
| Actual color                                                                                                                                                                                                                                                                                                                                                                                                                                                                                                                                                                                                                                                                                                                                                                                                                                                                                                                                                                                                                                                                                                                                          |  |                        |                           |                        |     |      |     |     |     |     |     |     |     |     |     |     |     |     |     |     |     |     |     |     |      |
| <b>Sun Protection SPF</b>                                                                                                                                                                                                                                                                                                                                                                                                                                                                                                                                                                                                                                                                                                                                                                                                                                                                                                                                                                                                                                                                                                                             |                                                                                    |                        |                           |                        |     |      |     |     |     |     |     |     |     |     |     |     |     |     |     |     |     |     |     |     |      |
| Commercial sunscreen (control)                                                                                                                                                                                                                                                                                                                                                                                                                                                                                                                                                                                                                                                                                                                                                                                                                                                                                                                                                                                                                                                                                                                        | 13.9                                                                               |                        |                           |                        |     |      |     |     |     |     |     |     |     |     |     |     |     |     |     |     |     |     |     |     |      |
| Supplemented 5wt% L-O2                                                                                                                                                                                                                                                                                                                                                                                                                                                                                                                                                                                                                                                                                                                                                                                                                                                                                                                                                                                                                                                                                                                                | 84.6                                                                               |                        |                           |                        |     |      |     |     |     |     |     |     |     |     |     |     |     |     |     |     |     |     |     |     |      |
| <b>UV Transmittance spectra</b>                                                                                                                                                                                                                                                                                                                                                                                                                                                                                                                                                                                                                                                                                                                                                                                                                                                                                                                                                                                                                                                                                                                       |                                                                                    |                        |                           |                        |     |      |     |     |     |     |     |     |     |     |     |     |     |     |     |     |     |     |     |     |      |
|  <p>The graph displays UV Transmittance spectra. The y-axis is Transmittance (%) from 0 to 12, and the x-axis is Wavelength (nm) from 280 to 400. Two curves are shown: Control (purple dotted line) and L-O2 (green solid line). The Control curve starts at ~10% at 280 nm, dips to ~5% at 370 nm, and rises to ~8% at 400 nm. The L-O2 curve starts at ~0.5% at 280 nm, remains low until 370 nm, and then rises to ~10% at 400 nm.</p> <table border="1"> <caption>Approximate data points from the UV Transmittance spectra graph</caption> <thead> <tr> <th>Wavelength (nm)</th> <th>Control Transmittance (%)</th> <th>L-O2 Transmittance (%)</th> </tr> </thead> <tbody> <tr> <td>280</td> <td>10.0</td> <td>0.5</td> </tr> <tr> <td>300</td> <td>7.0</td> <td>1.5</td> </tr> <tr> <td>320</td> <td>6.0</td> <td>2.0</td> </tr> <tr> <td>340</td> <td>5.5</td> <td>2.5</td> </tr> <tr> <td>360</td> <td>5.0</td> <td>2.5</td> </tr> <tr> <td>380</td> <td>5.0</td> <td>3.0</td> </tr> <tr> <td>400</td> <td>8.0</td> <td>10.0</td> </tr> </tbody> </table> |                                                                                    | Wavelength (nm)        | Control Transmittance (%) | L-O2 Transmittance (%) | 280 | 10.0 | 0.5 | 300 | 7.0 | 1.5 | 320 | 6.0 | 2.0 | 340 | 5.5 | 2.5 | 360 | 5.0 | 2.5 | 380 | 5.0 | 3.0 | 400 | 8.0 | 10.0 |
| Wavelength (nm)                                                                                                                                                                                                                                                                                                                                                                                                                                                                                                                                                                                                                                                                                                                                                                                                                                                                                                                                                                                                                                                                                                                                       | Control Transmittance (%)                                                          | L-O2 Transmittance (%) |                           |                        |     |      |     |     |     |     |     |     |     |     |     |     |     |     |     |     |     |     |     |     |      |
| 280                                                                                                                                                                                                                                                                                                                                                                                                                                                                                                                                                                                                                                                                                                                                                                                                                                                                                                                                                                                                                                                                                                                                                   | 10.0                                                                               | 0.5                    |                           |                        |     |      |     |     |     |     |     |     |     |     |     |     |     |     |     |     |     |     |     |     |      |
| 300                                                                                                                                                                                                                                                                                                                                                                                                                                                                                                                                                                                                                                                                                                                                                                                                                                                                                                                                                                                                                                                                                                                                                   | 7.0                                                                                | 1.5                    |                           |                        |     |      |     |     |     |     |     |     |     |     |     |     |     |     |     |     |     |     |     |     |      |
| 320                                                                                                                                                                                                                                                                                                                                                                                                                                                                                                                                                                                                                                                                                                                                                                                                                                                                                                                                                                                                                                                                                                                                                   | 6.0                                                                                | 2.0                    |                           |                        |     |      |     |     |     |     |     |     |     |     |     |     |     |     |     |     |     |     |     |     |      |
| 340                                                                                                                                                                                                                                                                                                                                                                                                                                                                                                                                                                                                                                                                                                                                                                                                                                                                                                                                                                                                                                                                                                                                                   | 5.5                                                                                | 2.5                    |                           |                        |     |      |     |     |     |     |     |     |     |     |     |     |     |     |     |     |     |     |     |     |      |
| 360                                                                                                                                                                                                                                                                                                                                                                                                                                                                                                                                                                                                                                                                                                                                                                                                                                                                                                                                                                                                                                                                                                                                                   | 5.0                                                                                | 2.5                    |                           |                        |     |      |     |     |     |     |     |     |     |     |     |     |     |     |     |     |     |     |     |     |      |
| 380                                                                                                                                                                                                                                                                                                                                                                                                                                                                                                                                                                                                                                                                                                                                                                                                                                                                                                                                                                                                                                                                                                                                                   | 5.0                                                                                | 3.0                    |                           |                        |     |      |     |     |     |     |     |     |     |     |     |     |     |     |     |     |     |     |     |     |      |
| 400                                                                                                                                                                                                                                                                                                                                                                                                                                                                                                                                                                                                                                                                                                                                                                                                                                                                                                                                                                                                                                                                                                                                                   | 8.0                                                                                | 10.0                   |                           |                        |     |      |     |     |     |     |     |     |     |     |     |     |     |     |     |     |     |     |     |     |      |

**Fig. S1** Preliminary characterization of the physical properties of the O<sub>2</sub>-delig lignin (collected from all the O<sub>2</sub>-delig runs with week-long impregnation)

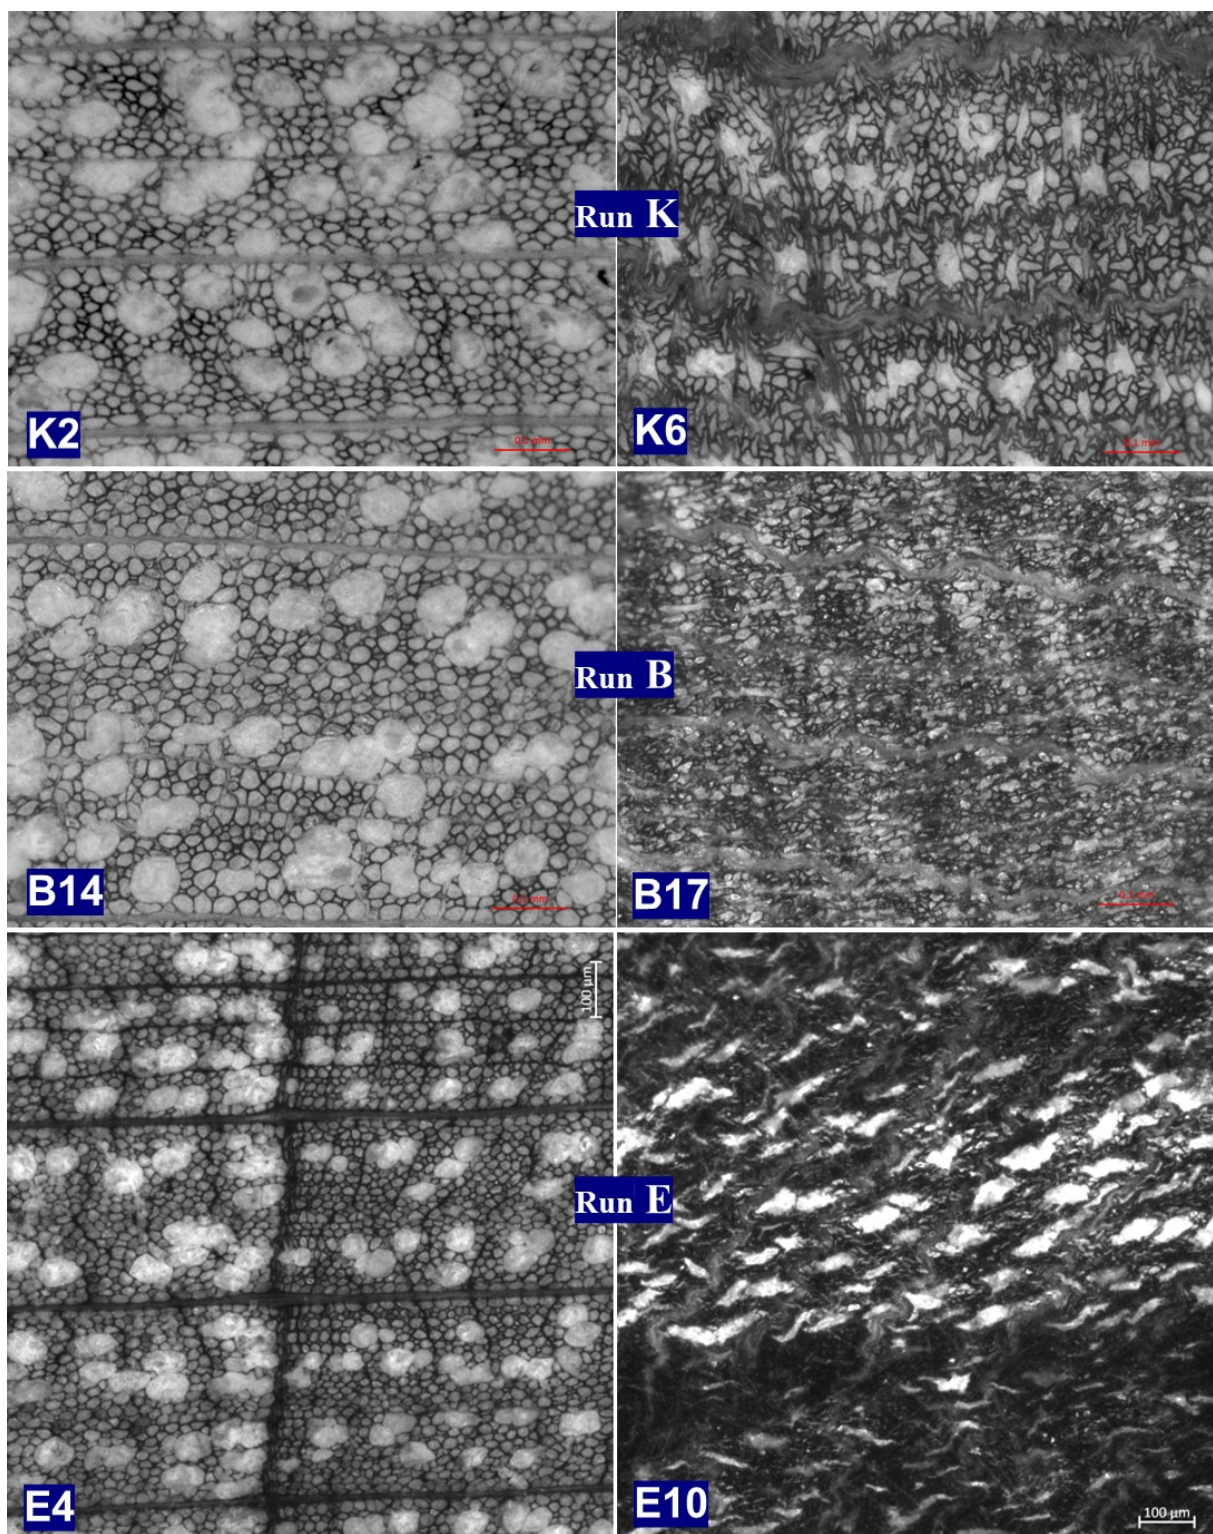

**Fig. S2** Effect of wood alkali impregnation for O<sub>2</sub>-delign on wood delignification and densification revealed by light microscopy images of anatomical wood cell microstructures. Left column after O<sub>2</sub>-delign before densification. Right column after densification. Run K is control without alkali impregnation and O<sub>2</sub>-delign. Run B: short (2 h) impregnation time at 70°C; Run E: long (a week) impregnation time at 25°C.

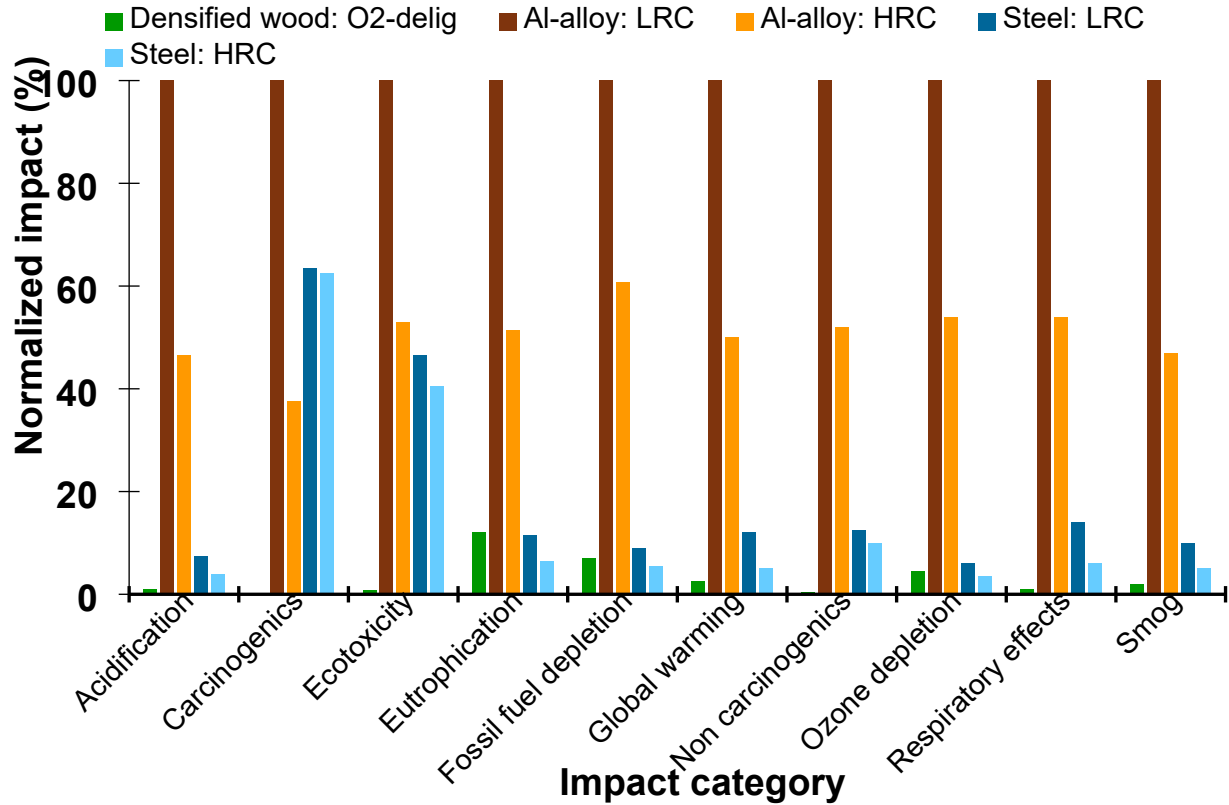

**Fig. S3** Cradle-to-gate environmental impacts to produce building materials based on specific strength. Specific strengths: The comparison of specific strengths was based on modulus of rupture (MOR) for densified wood and ultimate tensile strength (UTS) for the metal alloys. Specific strengths: Advanced-wood, MOR: 221 MPa cm<sup>3</sup>/g; Al-alloy, UTS: 168 MPa cm<sup>3</sup>/g; HSSS (specific strength steel), UTS: 168 MPa cm<sup>3</sup>/g

(<https://asm.matweb.com/search/SpecificMaterial.asp?bassnum=MA2024T4>,  
[https://static.markforged.com/downloads/markforged\\_datasheet\\_17-4\\_ph\\_stainless\\_steel.pdf](https://static.markforged.com/downloads/markforged_datasheet_17-4_ph_stainless_steel.pdf)  
<https://specialtysteelsupply.com/wp-content/docs/17-4ph.pdf>)
